# Supplementary material for: A high trans-zeatin nucleoside concentration in corms may promote the multileaf growth of Amorphophallus muelleri
Source: Front Plant Sci. 2022 Oct 6;13:964003. doi: 10.3389/fpls.2022.964003 (PMC9583388; doi:10.3389/fpls.2022.964003)
Supplement: Supplemental Table 1 — Information about standards and stable isotope-labeled internal standards. [file Table_1.xlsx]

## Sheet: Sheet1
Standard substances	Abbr.	CAS	M.W.	Formula	Producers
N6-isopentenyladenosine	IPA	7724-76-7	335.4	C15H21N5O4	Sigma
Kinetin	K	525-79-1	215.2	C10H9N5O	Sigma
trans-Zeatin-riboside	tZR	6025-53-2	351.36	C15H21N5O5	Sigma
Indole-3-acetic acid	IAA	87-51-4	175.18	C10H9NO2	Sigma
N6-(delta 2-Isopentenyl)-adenine	IP	2365-40-4	203.24	C10H13N5	Sigma
trans-Zeatin	tZ	1637-39-4	219.24	C10H13N5O	Sigma
(+)-Abscisic acid	ABA	21293-29-8	264.32	C15H20O4	Sigma
cis-Zeatin	cZ	32771-64-5	219.24	C10H13N5O	Sigma
Name of standard substance	Producers
Indole-3-acetic acid-D2	ISOREAG
Indole-3-carboxaldehyde-13C	ISOREAG
trans-Zeatin-D5	ISOREAG
(+)-cis,trans-Abscisic acid-D6	ISOREAG
N6-isopentenyladenosine -D6	ISOREAG
cis-Zeatin-13C	ISOREAG
trans-Zeatin-riboside-13C,D2	ISOREAG
Kinetin-13C	ISOREAG
